# Supplementary material
Source: ML conference proceedings conference paper supplement (https://www.ecva.net/papers/eccv_2020/papers_ECCV/html/123540460_ECCV_2020_paper.php)
Supplement: Supplementary file 1 [file 123540460-supp.zip]

# Supplementary Material: Learnable Cost Volume Using the Cayley Representation

Taihong Xiao<sup>1</sup>[0000–0002–6953–7100], Jinwei Yuan<sup>2</sup>, Deqing  
Sun<sup>2</sup>[0000–0003–0329–0456], Qifei Wang<sup>2</sup>, Xin-Yu Zhang<sup>3</sup>, Kehan Xu<sup>4</sup>, and  
Ming-Hsuan Yang<sup>1,2</sup>[0000–0003–4848–2304]

<sup>1</sup> University of California, Merced {txiao3,mhyang}@ucmerced.edu

<sup>2</sup> Google Research {jinwei,deqingsun,qfwang,minghsuan}@google.com

<sup>3</sup> Nankai University xinyuzhang@mail.nankai.edu.cn

<sup>4</sup> Peking University yurina@pku.edu.cn

## 1 Proofs of Theorems

### 1.1 Proof of Theorem 1

The Theorem of Cayley representation was first given by Cayley in his paper [1]. However, the old paper is not available online. For convenience, we give a simple proof here.

*Proof.* First, we validate that the  $\mathbf{P}$  is a orthogonal matrix. The condition that  $\mathbf{S} \in \text{SO}^*(n)$  ensures that  $(\mathbf{I} + \mathbf{S})$  is invertible. Since  $\mathbf{S}$  is skew-symmetric, so  $\mathbf{S}^\top \mathbf{S} = -\mathbf{S}^2 = \mathbf{S}\mathbf{S}^\top$ . Hence we have

$$\mathbf{P}^\top \mathbf{P} = (\mathbf{I} + \mathbf{S})^{-\top} (\mathbf{I} - \mathbf{S})^\top (\mathbf{I} - \mathbf{S})(\mathbf{I} + \mathbf{S})^{-1} \quad (1)$$

$$= (\mathbf{I} + \mathbf{S}^\top)^{-1} (\mathbf{I} - \mathbf{S}^\top)(\mathbf{I} - \mathbf{S})(\mathbf{I} + \mathbf{S})^{-1} \quad (2)$$

$$= (\mathbf{I} - \mathbf{S})^{-1} (\mathbf{I} - \mathbf{S}^\top - \mathbf{S} - \mathbf{S}^\top \mathbf{S})(\mathbf{I} + \mathbf{S})^{-1} \quad (3)$$

$$= (\mathbf{I} - \mathbf{S})^{-1} (\mathbf{I} - \mathbf{S}^\top - \mathbf{S} - \mathbf{S}\mathbf{S}^\top)(\mathbf{I} + \mathbf{S})^{-1} \quad (4)$$

$$= (\mathbf{I} - \mathbf{S})^{-1} (\mathbf{I} - \mathbf{S})(\mathbf{I} - \mathbf{S}^\top)(\mathbf{I} + \mathbf{S})^{-1} \quad (5)$$

$$= (\mathbf{I} - \mathbf{S}^\top)(\mathbf{I} + \mathbf{S})^{-1} \quad (6)$$

$$= (\mathbf{I} + \mathbf{S})(\mathbf{I} + \mathbf{S})^{-1} \quad (7)$$

$$= \mathbf{I}. \quad (8)$$

Next, we need to show the uniqueness of the Cayley representation.

$$\mathbf{P} = (\mathbf{I} - \mathbf{S})(\mathbf{I} + \mathbf{S})^{-1} \quad (9)$$

$$\iff \mathbf{P}(\mathbf{I} + \mathbf{S}) = \mathbf{I} - \mathbf{S} \quad (10)$$

$$\iff \mathbf{P} + \mathbf{P}\mathbf{S} = \mathbf{I} - \mathbf{S} \quad (11)$$

$$\iff \mathbf{S} + \mathbf{P}\mathbf{S} = \mathbf{I} - \mathbf{P} \quad (12)$$

$$\iff (\mathbf{I} + \mathbf{P})\mathbf{S} = \mathbf{I} - \mathbf{P} \quad (13)$$

$$\iff \mathbf{S} = (\mathbf{I} + \mathbf{P})^{-1}(\mathbf{I} - \mathbf{P}) \quad (14)$$

Therefore, the skew-symmetric matrix  $\mathbf{S}$  is uniquely represented by  $\mathbf{P}$ , which concludes the proof.  $\square$

## 1.2 Proof of Theorem 2

Before giving the proof, we would like to recall the definition of connectedness.

**Definition 1 (Connectedness)** *A set of matrices  $\mathcal{G}$  is said to be connected if for all  $\mathbf{A}$  and  $\mathbf{B}$  in  $\mathcal{G}$ , there exists a continuous path  $\mathbf{A}(t)$ ,  $0 \leq t \leq 1$ , lying with  $\mathbf{A}(0) = \mathbf{A}$  and  $\mathbf{A}(1) = \mathbf{B}$ .*

The above definition of connectedness is actually path connectedness in topology. Now we begin our proof of Theorem 2.

*Proof.* Since the identity matrix  $\mathbf{I} \in \text{SO}^*(n)$ , it suffices to prove that for any  $\mathbf{X} \in \text{SO}^*(n)$ , there exists a continuous path  $\mathbf{A}(t)$ ,  $0 \leq t \leq 1$ , such that  $\mathbf{A}(0) = \mathbf{I}$  and  $\mathbf{A}(1) = \mathbf{X}$ . For any  $\mathbf{X} \in \text{SO}^*(n)$ , we have its spectral decomposition

$$\mathbf{X} = \mathbf{P}^\top \text{diag}(K_1, \dots, K_q, 1, \dots, 1) \mathbf{P}, \quad (15)$$

where the  $\mathbf{P} \in \text{O}(n)$  and  $0 \leq q \leq n/2$ , and

$$K_\lambda = \begin{pmatrix} \cos(\theta_\lambda) & -\sin(\theta_\lambda) \\ \sin(\theta_\lambda) & \cos(\theta_\lambda) \end{pmatrix}, \quad \theta_\lambda \in [-\pi, \pi), \quad \lambda = 1, \dots, q. \quad (16)$$

If we put

$$K_\lambda(t) = \begin{pmatrix} \cos(t\theta_\lambda) & -\sin(t\theta_\lambda) \\ \sin(t\theta_\lambda) & \cos(t\theta_\lambda) \end{pmatrix}, \quad (17)$$

then the path required is

$$\mathbf{A}(t) = \mathbf{P}^\top \text{diag}(K_1(t), \dots, K_q(t), 1, \dots, 1) \mathbf{P}. \quad (18)$$

□

## 2 More Results

### 2.1 Ranking on Sintel and KITTI 2015 Benchmark

The ranking results on the Sintel and KITTI 2015 benchmark can be found at <http://sintel.is.tue.mpg.de/results> and [http://www.cvlibs.net/datasets/kitti/eval\\_scene\\_flow.php?benchmark=flow](http://www.cvlibs.net/datasets/kitti/eval_scene_flow.php?benchmark=flow). Here we capture the screenshot of the ranking results by March 8, 2020.

Final Clean

|                                   | EPE all | EPE matched | EPE unmatched | d0-10 | d10-60 | d60-140 | s0-10 | s10-40 | s40+   |                                   |
|-----------------------------------|---------|-------------|---------------|-------|--------|---------|-------|--------|--------|-----------------------------------|
| GroundTruth <sup>[1]</sup>        | 0.000   | 0.000       | 0.000         | 0.000 | 0.000  | 0.000   | 0.000 | 0.000  | 0.000  | <a href="#">Visualize Results</a> |
| ScopeFlow <sup>[2]</sup>          | 4.098   | 1.999       | 21.214        | 4.028 | 1.689  | 1.180   | 0.725 | 2.589  | 24.477 | <a href="#">Visualize Results</a> |
| MaskFlowNet <sup>[3]</sup>        | 4.172   | 2.048       | 21.494        | 3.783 | 1.745  | 1.310   | 0.592 | 2.389  | 26.253 | <a href="#">Visualize Results</a> |
| Anonymous872 <sup>[4]</sup>       | 4.200   | 2.099       | 21.330        | 4.276 | 1.738  | 1.259   | 0.933 | 2.592  | 24.297 | <a href="#">Visualize Results</a> |
| FlowElements <sup>[5]</sup>       | 4.224   | 1.956       | 22.704        | 3.288 | 1.479  | 1.419   | 0.646 | 1.897  | 27.596 | <a href="#">Visualize Results</a> |
| SelfFlow <sup>[6]</sup>           | 4.262   | 2.040       | 22.369        | 4.083 | 1.715  | 1.287   | 0.582 | 2.343  | 27.154 | <a href="#">Visualize Results</a> |
| MaskFlowNet-S <sup>[7]</sup>      | 4.384   | 2.120       | 22.840        | 3.905 | 1.821  | 1.359   | 0.645 | 2.526  | 27.429 | <a href="#">Visualize Results</a> |
| VCN <sup>[8]</sup>                | 4.404   | 2.216       | 22.238        | 4.381 | 1.782  | 1.423   | 0.955 | 2.725  | 25.570 | <a href="#">Visualize Results</a> |
| LiteFlowNet3 <sup>[9]</sup>       | 4.448   | 2.089       | 23.681        | 3.873 | 1.755  | 1.344   | 0.754 | 2.503  | 27.471 | <a href="#">Visualize Results</a> |
| GCA-Net <sup>[10]</sup>           | 4.494   | 2.168       | 23.464        | 3.926 | 1.702  | 1.545   | 0.800 | 2.593  | 27.422 | <a href="#">Visualize Results</a> |
| ContinualFlow_ROB <sup>[11]</sup> | 4.528   | 2.723       | 19.248        | 5.050 | 2.573  | 1.713   | 0.872 | 3.114  | 26.063 | <a href="#">Visualize Results</a> |
| LiteFlowNet3-S <sup>[12]</sup>    | 4.529   | 2.120       | 24.162        | 3.952 | 1.720  | 1.398   | 0.795 | 2.502  | 27.949 | <a href="#">Visualize Results</a> |
| MFF <sup>[13]</sup>               | 4.566   | 2.216       | 23.732        | 4.664 | 2.017  | 1.222   | 0.893 | 2.902  | 26.810 | <a href="#">Visualize Results</a> |
| IRR-PWC <sup>[14]</sup>           | 4.579   | 2.154       | 24.355        | 4.165 | 1.843  | 1.292   | 0.709 | 2.423  | 28.998 | <a href="#">Visualize Results</a> |
| WC-Net+ <sup>[15]</sup>           | 4.596   | 2.254       | 23.696        | 4.781 | 2.045  | 1.234   | 0.945 | 2.978  | 26.620 | <a href="#">Visualize Results</a> |
| PPAC-HD3 <sup>[16]</sup>          | 4.599   | 2.116       | 24.852        | 3.521 | 1.702  | 1.637   | 0.617 | 2.083  | 30.457 | <a href="#">Visualize Results</a> |
| CompactFlow <sup>[17]</sup>       | 4.626   | 2.099       | 25.253        | 4.192 | 1.825  | 1.233   | 0.845 | 2.677  | 28.120 | <a href="#">Visualize Results</a> |
| PCF-F <sup>[18]</sup>             | 4.630   | 2.197       | 24.465        | 3.410 | 1.737  | 1.744   | 0.603 | 2.131  | 30.652 | <a href="#">Visualize Results</a> |
| RichFlow-ft-Inf <sup>[19]</sup>   | 4.634   | 2.152       | 24.886        | 4.187 | 1.815  | 1.377   | 0.802 | 2.519  | 28.780 | <a href="#">Visualize Results</a> |
| HD3-Flow <sup>[20]</sup>          | 4.666   | 2.174       | 24.994        | 3.786 | 1.719  | 1.647   | 0.657 | 2.182  | 30.579 | <a href="#">Visualize Results</a> |
| LiteFlowNet2 <sup>[21]</sup>      | 4.686   | 2.248       | 24.571        | 4.048 | 1.899  | 1.473   | 0.811 | 2.433  | 29.375 | <a href="#">Visualize Results</a> |

(a) Sintel Final

Final Clean

|                                | EPE all | EPE matched | EPE unmatched | d0-10 | d10-60 | d60-140 | s0-10 | s10-40 | s40+   |                                   |
|--------------------------------|---------|-------------|---------------|-------|--------|---------|-------|--------|--------|-----------------------------------|
| GroundTruth <sup>[1]</sup>     | 0.000   | 0.000       | 0.000         | 0.000 | 0.000  | 0.000   | 0.000 | 0.000  | 0.000  | <a href="#">Visualize Results</a> |
| MaskFlowNet <sup>[2]</sup>     | 2.521   | 0.989       | 15.032        | 2.742 | 0.908  | 0.291   | 0.361 | 1.285  | 16.261 | <a href="#">Visualize Results</a> |
| MR-Flow <sup>[3]</sup>         | 2.527   | 0.954       | 15.365        | 2.866 | 0.710  | 0.420   | 0.446 | 1.715  | 14.826 | <a href="#">Visualize Results</a> |
| ProFlow_ROB <sup>[4]</sup>     | 2.709   | 1.013       | 16.549        | 2.843 | 0.723  | 0.518   | 0.485 | 1.586  | 16.470 | <a href="#">Visualize Results</a> |
| MaskFlowNet-S <sup>[5]</sup>   | 2.771   | 1.077       | 16.608        | 2.901 | 0.996  | 0.342   | 0.419 | 1.404  | 17.777 | <a href="#">Visualize Results</a> |
| VCN <sup>[6]</sup>             | 2.808   | 1.108       | 16.682        | 3.267 | 0.967  | 0.418   | 0.646 | 1.669  | 16.302 | <a href="#">Visualize Results</a> |
| ProFlow <sup>[7]</sup>         | 2.818   | 1.027       | 17.428        | 2.892 | 0.751  | 0.496   | 0.469 | 1.626  | 17.369 | <a href="#">Visualize Results</a> |
| Anonymous872 <sup>[8]</sup>    | 2.833   | 1.093       | 17.039        | 3.210 | 0.875  | 0.400   | 0.607 | 1.607  | 16.860 | <a href="#">Visualize Results</a> |
| SIM-PM <sup>[9]</sup>          | 2.910   | 1.016       | 18.357        | 2.797 | 0.756  | 0.479   | 0.559 | 1.732  | 17.431 | <a href="#">Visualize Results</a> |
| FlowFields++ <sup>[10]</sup>   | 2.943   | 0.850       | 20.027        | 2.550 | 0.603  | 0.403   | 0.560 | 1.859  | 17.401 | <a href="#">Visualize Results</a> |
| GCA-Net <sup>[11]</sup>        | 2.947   | 1.032       | 18.585        | 2.900 | 0.830  | 0.456   | 0.602 | 1.645  | 17.753 | <a href="#">Visualize Results</a> |
| LiteFlowNet3 <sup>[12]</sup>   | 2.994   | 1.148       | 18.077        | 3.000 | 0.985  | 0.498   | 0.559 | 1.670  | 18.302 | <a href="#">Visualize Results</a> |
| LiteFlowNet3-S <sup>[13]</sup> | 3.028   | 1.173       | 18.182        | 3.079 | 0.996  | 0.527   | 0.574 | 1.646  | 18.566 | <a href="#">Visualize Results</a> |
| FlowFields+ <sup>[14]</sup>    | 3.102   | 0.820       | 21.718        | 2.340 | 0.616  | 0.373   | 0.593 | 1.865  | 18.549 | <a href="#">Visualize Results</a> |
| DIP-Flow <sup>[15]</sup>       | 3.103   | 0.881       | 21.227        | 2.574 | 0.681  | 0.419   | 0.548 | 1.801  | 18.979 | <a href="#">Visualize Results</a> |
| PST <sup>[16]</sup>            | 3.110   | 0.942       | 20.809        | 2.759 | 0.664  | 0.378   | 0.635 | 2.069  | 17.919 | <a href="#">Visualize Results</a> |
| MPIF <sup>[17]</sup>           | 3.111   | 1.134       | 19.218        | 3.070 | 0.939  | 0.523   | 0.616 | 1.980  | 18.220 | <a href="#">Visualize Results</a> |
| PGM-C <sup>[18]</sup>          | 3.234   | 0.929       | 22.045        | 2.724 | 0.659  | 0.424   | 0.567 | 1.999  | 19.467 | <a href="#">Visualize Results</a> |
| CPM2 <sup>[19]</sup>           | 3.253   | 0.980       | 21.812        | 2.663 | 0.751  | 0.416   | 0.615 | 1.954  | 19.503 | <a href="#">Visualize Results</a> |
| L0-norm-Flow2 <sup>[20]</sup>  | 3.298   | 1.069       | 21.502        | 2.512 | 0.826  | 0.600   | 0.711 | 1.940  | 19.449 | <a href="#">Visualize Results</a> |

(b) Sintel Clean

Fig. 1: Ranking results on Sintel and KITTI 2015 benchmark.

Evaluation ground truth  Evaluation area

|                                                                                                                                                                                                                                                                                             | Method                | Setting | Code | FI-bg  | FI-fg   | FI-all | Density  | Runtime | Environment                       | Compare |
|---------------------------------------------------------------------------------------------------------------------------------------------------------------------------------------------------------------------------------------------------------------------------------------------|-----------------------|---------|------|--------|---------|--------|----------|---------|-----------------------------------|---------|
| 1                                                                                                                                                                                                                                                                                           | UberATG-DRISE         |         |      | 3.59 % | 10.40 % | 4.73 % | 100.00 % | 0.75 s  | CPU+GPU @ 2.5 Ghz (Python)        |         |
| W. Ma, S. Wang, R. Hu, Y. Xiong and R. Urtasun: <i>Deep Rigid Instance Scene Flow</i> . CVPR 2019.                                                                                                                                                                                          |                       |         |      |        |         |        |          |         |                                   |         |
| 2                                                                                                                                                                                                                                                                                           | ACOFE                 |         |      | 4.56 % | 12.00 % | 5.79 % | 100.00 % | 5 min   | 1 core @ 3.0 Ghz (Matlab + C/C++) |         |
| 3                                                                                                                                                                                                                                                                                           | PCF-F                 |         |      | 6.05 % | 5.99 %  | 6.04 % | 100.00 % | 0.08 s  | GPU @ 2.5 Ghz (Python)            |         |
| 4                                                                                                                                                                                                                                                                                           | PPAC-HD3              |         |      | 5.78 % | 7.48 %  | 6.06 % | 100.00 % | 0.14 s  | NVIDIA GTX 1080 Ti                |         |
| 5                                                                                                                                                                                                                                                                                           | MaskFlowNet           |         |      | 5.79 % | 7.70 %  | 6.11 % | 100.00 % | 0.06 s  | NVIDIA TITAN Xp                   |         |
| 6                                                                                                                                                                                                                                                                                           | ISF                   |         |      | 5.40 % | 10.29 % | 6.22 % | 100.00 % | 10 min  | 1 core @ 3 Ghz (C/C++)            |         |
| A. Behl, O. Jafari, S. Mustikovela, H. Alhalja, C. Rother and A. Geiger: <i>Bounding Boxes, Segmentations and Object Coordinates: How Important is Recognition for 3D Scene Flow Estimation in Autonomous Driving Scenarios?</i> . International Conference on Computer Vision (ICCV) 2017. |                       |         |      |        |         |        |          |         |                                   |         |
| 7                                                                                                                                                                                                                                                                                           | Anonymous 872         |         |      | 5.75 % | 8.80 %  | 6.25 % | 100.00 % | 0.26 s  | 1 core @ 2.5 Ghz (Python)         |         |
| 8                                                                                                                                                                                                                                                                                           | VCN                   |         | code | 5.83 % | 8.66 %  | 6.30 % | 100.00 % | 0.18 s  | Titan X Pascal                    |         |
| G. Yang and D. Ramanan: <i>Volumetric Correspondence Networks for Optical Flow</i> . NeurIPS 2019.                                                                                                                                                                                          |                       |         |      |        |         |        |          |         |                                   |         |
| 9                                                                                                                                                                                                                                                                                           | Mono expansion        |         |      | 5.83 % | 8.66 %  | 6.30 % | 100.00 % | 0.25 s  | GPU @ 2.5 Ghz (Python)            |         |
| 10                                                                                                                                                                                                                                                                                          | Stereo expansion      |         |      | 5.83 % | 8.66 %  | 6.30 % | 100.00 % | 2 s     | GPU @ 2.5 Ghz (Python)            |         |
| 11                                                                                                                                                                                                                                                                                          | NSNR                  |         |      | 5.92 % | 8.78 %  | 6.40 % | 100.00 % | 0.2 s   | GPU @ 2.5 Ghz (Python)            |         |
| 12                                                                                                                                                                                                                                                                                          | FlowElements          |         | code | 6.22 % | 8.06 %  | 6.52 % | 100.00 % | 0.2 s   | GPU @ 2.5 Ghz (Python)            |         |
| 13                                                                                                                                                                                                                                                                                          | HD <sup>3</sup> -Flow |         | code | 6.05 % | 9.02 %  | 6.55 % | 100.00 % | 0.10 s  | NVIDIA Pascal Titan XP            |         |
| Z. Yin, T. Darrell and F. Yu: <i>Hierarchical Discrete Distribution Decomposition for Match Density Estimation</i> . CVPR 2019.                                                                                                                                                             |                       |         |      |        |         |        |          |         |                                   |         |
| 14                                                                                                                                                                                                                                                                                          | MPSD-ft               |         |      | 6.09 % | 9.46 %  | 6.65 % | 100.00 % | 0.1 s   | 1 core @ 2.5 Ghz (Python + C/C++) |         |
| 15                                                                                                                                                                                                                                                                                          | PRSM                  |         | code | 5.33 % | 13.40 % | 6.68 % | 100.00 % | 300 s   | 1 core @ 2.5 Ghz (C/C++)          |         |
| C. Vogel, K. Schindler and S. Roth: <i>3D Scene Flow Estimation with a Piecewise Rigid Scene Model</i> . icv 2015.                                                                                                                                                                          |                       |         |      |        |         |        |          |         |                                   |         |
| 16                                                                                                                                                                                                                                                                                          | RichFlow              |         |      | 6.62 % | 6.98 %  | 6.68 % | 100.00 % | 0.09 s  | NVIDIA P5000                      |         |
| ERROR: Wrong syntax in BIBTEX file.                                                                                                                                                                                                                                                         |                       |         |      |        |         |        |          |         |                                   |         |
| 17                                                                                                                                                                                                                                                                                          | MaskFlowNet-S         |         |      | 6.53 % | 8.21 %  | 6.81 % | 100.00 % | 0.03 s  | NVIDIA TITAN Xp                   |         |
| 18                                                                                                                                                                                                                                                                                          | ScopeFlow             |         |      | 6.72 % | 7.36 %  | 6.82 % | 100.00 % | -1 s    | Nvidia GPU                        |         |
| A. Bar-Haim and L. Wolf: <i>ScopeFlow: Dynamic Scene Scoping for Optical Flow</i> . The IEEE Conference on Computer Vision and Pattern Recognition (CVPR) 2020.                                                                                                                             |                       |         |      |        |         |        |          |         |                                   |         |
| 19                                                                                                                                                                                                                                                                                          | OSF-TC                |         |      | 5.76 % | 13.31 % | 7.02 % | 100.00 % | 50 min  | 1 core @ 2.5 Ghz (C/C++)          |         |
| M. Neoral and J. Sochman: <i>Object Scene Flow with Temporal Consistency</i> . 22nd Computer Vision Winter Workshop (CVWW) 2017.                                                                                                                                                            |                       |         |      |        |         |        |          |         |                                   |         |
| 20                                                                                                                                                                                                                                                                                          | DCFE                  |         |      | 7.22 % | 6.47 %  | 7.09 % | 100.00 % | tbd     | GPU @ 2.5 Ghz (Python + C/C++)    |         |

(c) KITTI 2015 - Supervised

|                                                                                                                       |               |  |      |         |         |         |          |        |                                    |  |
|-----------------------------------------------------------------------------------------------------------------------|---------------|--|------|---------|---------|---------|----------|--------|------------------------------------|--|
| 70                                                                                                                    | Intoflow      |  |      | 12.04 % | 20.50 % | 13.45 % | 100.00 % | 0.08 s | 1 core @ 2.5 Ghz (C/C++)           |  |
| 71                                                                                                                    | PR-SceneFlow  |  | code | 11.73 % | 24.33 % | 13.83 % | 100.00 % | 150 s  | 4 core @ 3.0 Ghz (Matlab + C/C++)  |  |
| C. Vogel, K. Schindler and S. Roth: <i>Piecewise Rigid Scene Flow</i> . ICCV 2013.                                    |               |  |      |         |         |         |          |        |                                    |  |
| 72                                                                                                                    | Anonymous 872 |  |      | 12.98 % | 19.83 % | 14.12 % | 100.00 % | 0.1 s  | GPU @ 2.5 Ghz (Python)             |  |
| 73                                                                                                                    | MPSD-noft     |  |      | 7.72 %  | 46.40 % | 14.16 % | 100.00 % | .1 s   | 1 core @ 2.5 Ghz (Python + C/C++)  |  |
| 74                                                                                                                    | SelfFlow      |  |      | 12.68 % | 21.74 % | 14.19 % | 100.00 % | 0.09 s | GPU @ 2.5 Ghz (Python)             |  |
| P. Liu, M. Lyu, I. King and J. Xu: <i>SelfFlow: Self-Supervised Learning of Optical Flow</i> . CVPR 2019.             |               |  |      |         |         |         |          |        |                                    |  |
| 75                                                                                                                    | DDFlow        |  |      | 13.08 % | 20.40 % | 14.29 % | 100.00 % | 0.06 s | GPU @ >3.5 Ghz (Python + C/C++)    |  |
| P. Liu, I. King, M. Lyu and J. Xu: <i>DDFlow: Learning Optical Flow with Unlabeled Data Distillation</i> . AAAI 2019. |               |  |      |         |         |         |          |        |                                    |  |
| 76                                                                                                                    | Devon         |  |      | 13.28 % | 19.49 % | 14.31 % | 100.00 % | 0.04 s | 1 core @ 2.5 Ghz (C/C++)           |  |
| 77                                                                                                                    |               |  |      | 14.11 % | 18.28 % | 14.80 % | 100.00 % |        |                                    |  |
| 78                                                                                                                    | DCFlow        |  | code | 13.10 % | 23.70 % | 14.86 % | 100.00 % | 8.6 s  | GPU @ 3.0 Ghz (Matlab + C/C++)     |  |
| J. Xu, R. Ranftl and V. Koltun: <i>Accurate Optical Flow via Direct Cost Volume Processing</i> . CVPR 2017.           |               |  |      |         |         |         |          |        |                                    |  |
| 79                                                                                                                    | ProFlow       |  |      | 13.86 % | 20.91 % | 15.04 % | 100.00 % | 112 s  | GPU+CPU @ 3.6 Ghz (Python + C/C++) |  |
| D. Maurer and A. Bruhn: <i>ProFlow: Learning to Predict Optical Flow</i> . BMVC 2018.                                 |               |  |      |         |         |         |          |        |                                    |  |
| 80                                                                                                                    | FlowNetC-MD   |  |      | 15.98 % | 10.96 % | 15.14 % | 100.00 % | TBD s  | 1 core @ 2.5 Ghz (C/C++)           |  |

(d) KITTI 2015 - Unsupervised

Fig. 1: Ranking results on Sintel and KITTI 2015 benchmark.

## 2.2 More Visualization Results

As shown in Fig. 2 and 3, we compare our method with other methods under the supervised settings. We can observe that the flow boundary of the dragon in Fig. 2, which is predicted by VCN+LCV, is better than the other methods and the flow prediction near the tree (in front of the car) and fence by our method in Fig. 3 is more accurate compared with those of the others. The flow prediction for these pixels are challenging due to the occlusion. LCV explores more information among channel dimensions, which could help alleviate the problem of occlusion to some extent.

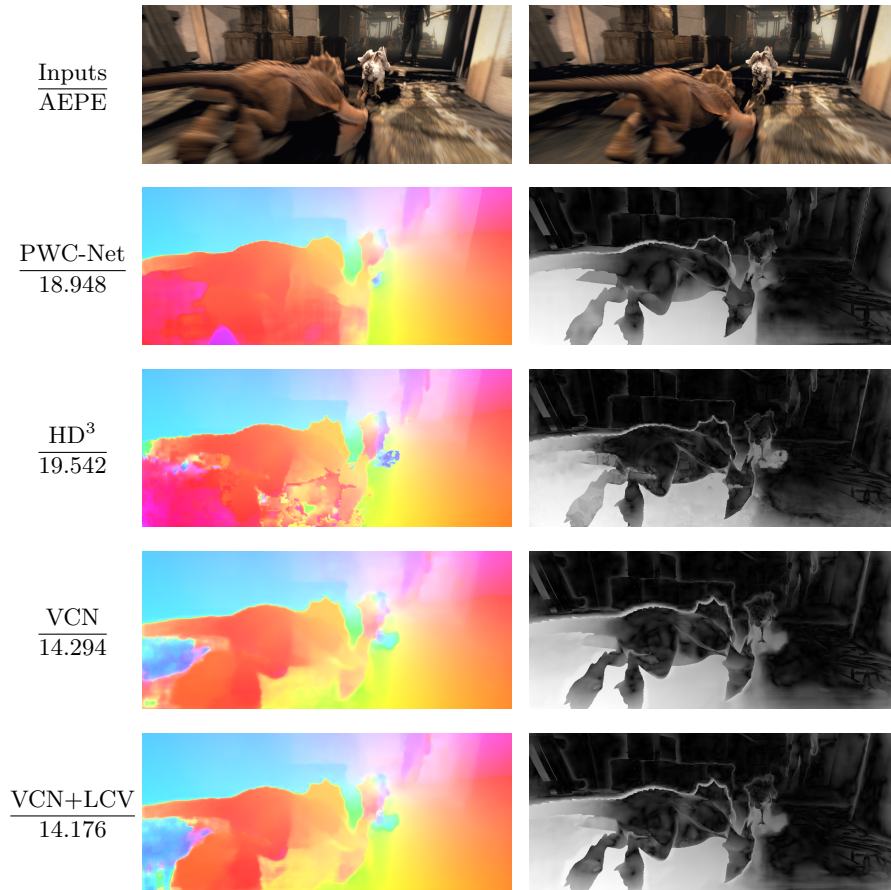

Fig. 2: More visualization results on “Market 4” from the Sintel test final pass. The number under each method name denotes the average end-point error (AEPE) on the given frames. The estimated flow and error maps are presented on the left and right sides, respectively. In the error map, the error of the estimated flow increases from black to white.

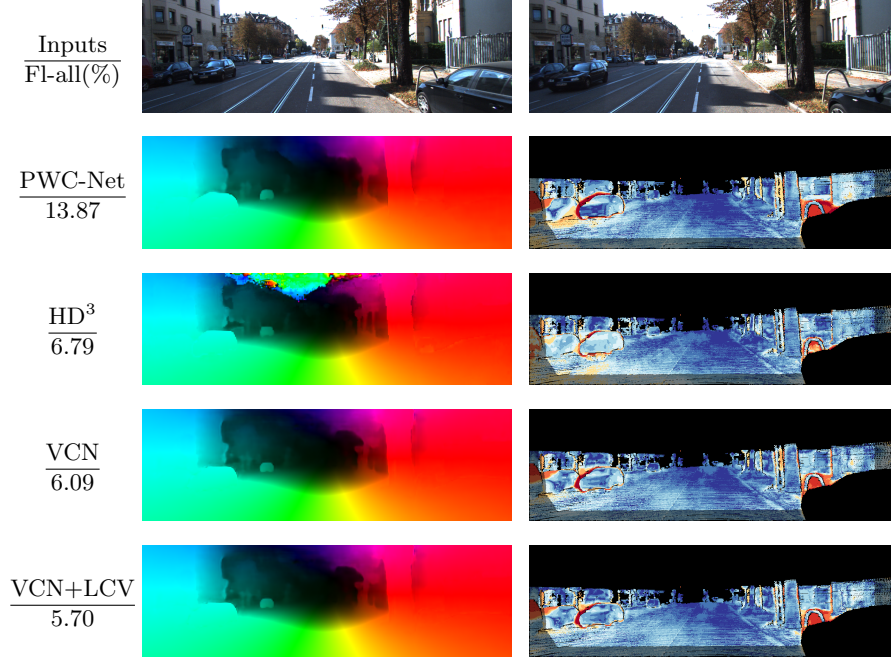

Fig. 3: More visualization results on the KITTI 2015 test set. The number under each method name denotes the Fl-all score on the given frames. The estimated flow and error maps are presented on the left and right sides, respectively. From blue to red, the error of the estimated flow increases in the error map.

### 2.3 More Visualization Result on Challenging Cases

We provide three videos showing the effectiveness of our method in three types of challenging cases: 1) illumination change; 2) noise; and 3) adversarial patches. The test videos are from the training set in the KITTI tracking benchmark. We compare the flow results under the normal setting with those under challenging settings. We can observe that the flow results of our model in either one of three challenging cases are temporarily consistent and reasonably good.

### 2.4 Visualization of the Learned Features

We visualize the feature maps for different eigenvalues in Fig. 4. We find that boundaries of (moving) objects are salient in the feature map corresponding to the max eigenvalue while the min eigenvalue mainly corresponds to background information, which results in more discriminative cost volume and more accurate flow estimation.

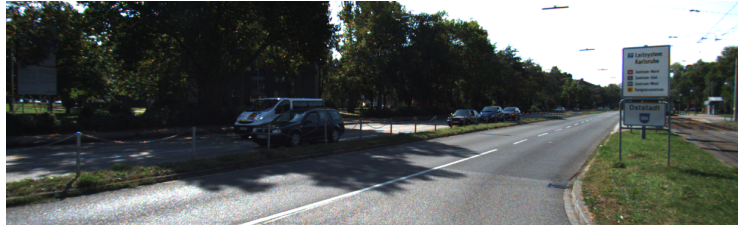

(a) frame

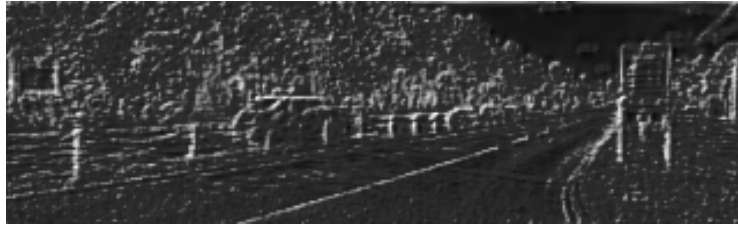

(b) feature (max eigenvalue)

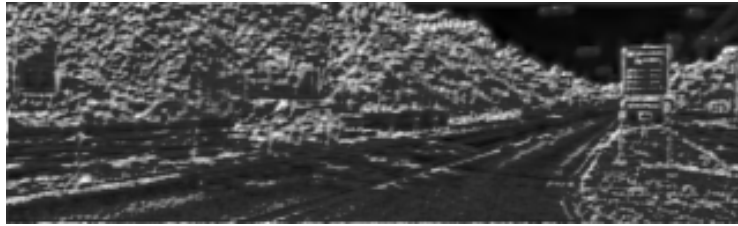

(c) feature (min eigenvalue)

Fig. 4: The feature maps corresponding to the largest the smallest eigenvalues.

## References

1. Cayley, A.: About the algebraic structure of the orthogonal group and the other classical groups in a field of characteristic zero or a prime characteristic. *Reine Angewandte Mathematik* **32**, 1846 (1846) [1](#)
