# Supplementary material
Source: ML conference proceedings conference paper supplement (https://www.ecva.net/papers/eccv_2020/papers_ECCV/html/123540460_ECCV_2020_paper.php)
Supplement: Supplementary file 2 [file 123540460-supp.zip]

Archive with 4 entries (4 files):
- 0872-supp.pdf
- demo_adv.mp4
- demo_lighting.mp4
- demo_noise.mp4
